# Supplementary material
Source: publisher figshare collection journal article supplement (https://acs.figshare.com/ndownloader/files/5149495)
Supplement: Supplementary file 1 [file 5149495]

## Experimental Section

**General:** All the reactions were conducted under an atmosphere of argon. Thin-layer chromatograms (TLC) were performed on precoated silica gel 60 F254 plates (Merck, 0.25 mm.). Flash chromatography separations were performed on silica gel (Merck 60, 230-400 mesh);  $^1\text{H}$  and  $^{13}\text{C}$  NMR chemical shifts  $\delta$  are reported in ppm relative to their standard reference ( $^1\text{H}$ :  $\text{CHCl}_3$  at 7.27 ppm;  $^{13}\text{C}$ :  $\text{CDCl}_3$  at 77.0 ppm). IR spectra were recorded in wavenumbers ( $\text{cm}^{-1}$ ). Mass spectra (MS) were recorded in the chemical ionization mode. Gas chromatography (GC) separation of compounds **1a**, **2a** and **3a** were performed on a Carlo-Erba ICU 600 with naphthalene as an internal standard. Twenty-five microliters of the 0.4 M reaction mixture were diluted with 1 mL of a  $10^{-2}$  M solution of naphthalene in ethyl acetate, washed with 1.5 mL of water and dried over  $\text{Na}_2\text{SO}_4$ . One microliter of this solution was injected (heating program:  $T = 105\text{ }^\circ\text{C}$  for 2.5 mins then  $10\text{ }^\circ\text{C}.\text{mn}^{-1}$  to  $T = 200\text{ }^\circ\text{C}$ . Retention times: 3.78; 4.40; 5.89 and 7.18 mins for **2a**, **3a**, **1a** and naphthalene respectively). Analytical data for compounds **2c**, **2g** are identical to authentic samples (Aldrich structure index FT-NMR 1 (1), 663C and FT-IR 1 (1), 424D for **2c**; Aldrich structure index FT-NMR 1 (2), 804A) for **2g**).

**1-Phenylnitrohexane (1g):** Following a modified reported procedure by Seebach.<sup>[26]</sup> To a solution of nitrobenzyle (18.25 mmol) in THF/HMPA (50:8 mL) at  $-78\text{ }^\circ\text{C}$  was added dropwise a solution of *n*-BuLi in hexane (38.32 mmol). After 2h, bromopentane (18.25 mmol) was added at the same temperature. After 10h, the reaction mixture was neutralized with 100 mL of a saturated solution of  $\text{NH}_4\text{Cl}$  and 5.2 mL of acetic acid. The aqueous layer was extracted several times with ether and the combined organic layers were dried over  $\text{Na}_2\text{SO}_4$  and concentrated *in vacuo*. Column chromatography of the resulting crude (eluent AcOEt/hexane 6:94) afforded 2.55 g (67%) of pure **1g** as a yellow oil. TLC  $R_f=0.65$  (Hexane/AcOEt 9:1);  $^1\text{H}$  (200 MHz,  $\text{CDCl}_3$ )  $\delta=0.89$  (t,  $J = 7.1\text{ Hz}$ , 3H), 1.31-1.36 (m, 6H), 1.98-2.17 (m, 1H), 2.41-2.60 (m, 1H), 5.47 (dd,  $J = 8.7\text{ Hz}$ ,  $J = 7.6\text{ Hz}$ ,

1H), 7.38-7.52 (m, 5H);  $^{13}\text{C}$  (50 MHz,  $\text{CDCl}_3$ )  $\delta$ =13.8, 22.2, 25.6, 31.0, 33.8, 91.5, 127.6, 128.9, 129.6, 134.7; IR (CsI) 2958, 2861, 1557, 1456, 1362  $\text{cm}^{-1}$ . MS  $m/z$  208 ( $\text{M} + \text{H}$ ) $^+$ , 225 ( $\text{M} + \text{NH}_4$ ) $^+$ .

**5-Nitro-hexan-2-one (1c):** Nitroethane (48.85 mmol) and diisopropylamine (24.42 mmol) were successively added to a solution of methylvinylketone (48.85 mmol) in 25 mL of chloroform. The reaction was stirred at reflux for 12h. Water (40 mL) was then added to the reaction mixture and the aqueous layer was extracted several times with AcOEt. Column chromatography of the crude (eluent AcOEt/hexane 20:80 to 25:75) afforded 3.27 g (75%) of pure **1c** as a yellowish oil. TLC  $R_f$ =0.40 (Hexane/AcOEt 7:3);  $^1\text{H}$  NMR (200 MHz,  $\text{CDCl}_3$ )  $\delta$ =1.48 (d,  $J$  = 6.5 Hz, 3H), 2.02-2.12 (m, 2H), 2.10 (s, 3H), 2.47 (t,  $J$  = 7.0 Hz, 2H), 4.48-4.64 (m, 1H);  $^{13}\text{C}$  (50 MHz,  $\text{CDCl}_3$ )  $\delta$ =19.2, 28.5, 29.9, 38.8, 82.4, 206.4; IR (CsI) 2993, 2942, 1718, 1550, 1361, 1171  $\text{cm}^{-1}$ ; MS  $m/z$  163 ( $\text{M} + \text{NH}_4$ ) $^+$ , 180 ( $\text{M} + \text{NH}_3 + \text{NH}_4$ ) $^+$ .

**5-Nitro-hexan-2-ol (1b):** Sodium borohydride (8.96 mmol) was added at 0 °C to the ketone **1c** (6.90 mmol) in solution in 12 mL of methanol. The reaction was stirred at 0 °C for 20 mins. The methanol was evaporated and 20 mL of water added to the crude. The aqueous layer was extracted several times with AcOEt. The desired product **1b** was obtained quantitatively as a colorless oil after a quick filtration on a pad of silica. TLC  $R_f$ =0.40 (Hexane/AcOEt 1:1);  $^1\text{H}$  NMR (200 MHz,  $\text{CDCl}_3$ )  $\delta$ =1.19 (d,  $J$  = 6.1 Hz, 1.7H first dia.), 1.20 (d,  $J$  = 6.0 Hz, 1.3H second dia.), 1.40-2.20 (m, 4H, H), 1.52 (d,  $J$  = 8.2 Hz, 1.7H first dia.), 1.53 (d,  $J$  = 8.2 Hz, 1.3H second dia.), 3.72-3.89 (m, 1H,  $\text{H}_2$ ), 4.51-4.65 (m, 1H,  $\text{H}_5$ );  $^{13}\text{C}$  (50 MHz,  $\text{CDCl}_3$ )  $\delta$ =19.2, 19.4, 23.7, 23.8, 31.1, 31.6, 34.6, 35.0, 67.0, 67.4, 83.3, 83.7; IR (CsI) 3368, 2970, 2932, 1550, 1391  $\text{cm}^{-1}$ . MS  $m/z$  148 ( $\text{M} + \text{H}$ ) $^+$ , 165 ( $\text{M} + \text{NH}_4$ ) $^+$ .

***tert*-Butyl-dimethyl-(1-methyl-4-nitro-pentyloxy)-silane (1d):** *tert*-Butyldimethyl-silane bromide (0.74 mmol) was added to a solution of imidazole (0.74 mmol) and **1b** (0.68 mmol) in 2 mL of dichloromethane. The reaction was refluxed for 4h after which 5 mL of water was added.

The aqueous layer was extracted several times with dichloromethane. Column chromatography of the crude (eluent AcOEt/hexane 20:80) afforded 0.15 g (82%) of pure **1d** as a colorless oil. TLC  $R_f$ =0.85 (hexane/AcOEt 4:1);  $^1\text{H}$  NMR (200 MHz,  $\text{CDCl}_3$ )  $\delta$ =0.04, 0.05 (s, 6H), 0.86, 0.88 (s, 6H), 1.12 (d,  $J$  = 6.3 Hz, 3H), 1.35-1.48 (m, 2H), 1.52 (d,  $J$  = 6.7 Hz, 3H), 3.75-3.89 (m, 1H), 4.51-4.63 (m, 1H);  $^{13}\text{C}$  (50 MHz,  $\text{CDCl}_3$ )  $\delta$ =-4.8, -4.3, 18.0, 19.2, 19.4, 23.6, 23.8, 25.8, 31.0, 31.5, 35.0, 35.4, 67.4, 67.8, 83.4, 83.8; IR (CsI) 2957, 2930, 2858, 1553, 1256  $\text{cm}^{-1}$ . MS  $m/z$  262 ( $\text{M} + \text{H}$ ) $^+$ , 279 ( $\text{M} + \text{NH}_4$ ) $^+$ .

**General Procedure for the Nitrosation of Secondary Nitroalkanes:** A solution of the nitroalkane (1 mmol), and sodium nitrite (2 mmol), in DMSO/water (7:1 V:V; 0.4M) was stirred at 65 °C until disappearance of the starting material (TLC). An equal volume of water was then added and the aqueous layer was extracted several times with diethyl ether. The combined organic layers were dried over  $\text{Na}_2\text{SO}_4$ , concentrated and the resulting crude was purified by column chromatography.

**5-Hydroxy-hexan-2-one (2b):**  $R_f$ =0.40 (Hexane/AcOEt 1:1);  $^1\text{H}$  NMR (300 MHz,  $\text{CDCl}_3$ )  $\delta$ =1.19 (d,  $J$  = 6.0 Hz, 3H), 1.64-1.74 (m, 2H), 2.17 (s, 3H), 2.59 (t,  $J$  = 7.1 Hz, 2H), 3.72-3.81 (m, 1H).

**5-(tert-Butyl-dimethyl-silanyloxy)-hexan-2-one (2d):**  $R_f$ =0.50 (Hexane-AcOEt 4:1);  $^1\text{H}$  NMR (200 MHz,  $\text{CDCl}_3$ )  $\delta$ =0.04, 0.05 (s, 6H), 0.88, 0.90 (s, 6H), 1.12 (d,  $J$  = 6.3 Hz, 3H), 1.52-1.71 (m, 2H), 2.15 (s, 3H), 2.47 (t,  $J$  = 7.3 Hz, 2H), 3.75-3.91 (m, 1H);  $^{13}\text{C}$  (50 MHz,  $\text{CDCl}_3$ )  $\delta$ =-4.8, -4.4, 18.0, 23.7, 25.9, 29.7, 29.9, 33.2, 39.8, 67.5, 209.2; IR (CsI) 2957, 2930, 2858, 1720, 1256  $\text{cm}^{-1}$ . MS  $m/z$  248 ( $\text{M} + \text{NH}_4$ ) $^+$ , 265 ( $\text{M} + \text{NH}_3 + \text{NH}_4$ ) $^+$ .

**2-Hydroxyimino-5-oxo-3,5-diphenyl-pentanoic acid ethyl ester (3e):**  $R_f$ =0.30 (Hexane-AcOEt 7:3);  $^1\text{H}$  NMR (300 MHz,  $\text{CDCl}_3$ )  $\delta$ =1.25 (m, 3H), 3.63 (d,  $J$  = 5.6 Hz, 0.7H one isomer), 3.69 (d,  $J$  = 6.0 Hz, 1.3H other isomer), 4.18-4.32 (m, 2H), 5.11-5.17 (m, 1H), 7.21-7.57 (m, 8H), 7.98 (d,  $J$  =

7.1 Hz, 2H);  $^{13}\text{C}$  (75 MHz,  $\text{CDCl}_3$ )  $\delta$ =13.9, 37.9, 41.4, 61.7, 127.1, 128.1, 128.4, 128.6, 136.4, 139.0, 151.2, 163.3, 198.0; MS  $m/z$  326 ( $\text{M} + \text{H}$ ) $^+$ , 343 ( $\text{M} + \text{NH}_4$ ) $^+$ .

**2-Hydroxyimino-3-methyl-pentanedioic acid 5-benzyl ester 1-ethyl ester (3f):**  $R_f$ =0.15 (Hexane-AcOEt 4:1);  $^1\text{H}$  NMR (300 MHz,  $\text{CDCl}_3$ )  $\delta$ =1.27-1.32 (m, 6H), 2.69 (ABX,  $J_{AB}$  = 16.4 Hz,  $J_{AX}$  = 6.8 Hz, 1H), 3.81 (ABX,  $J_{AB}$  = 16.4 Hz,  $J_{AX}$  = 8.7 Hz, 1H), 3.75-3.85 (m, 1H), 4.25 (q,  $J$  = 7.5 Hz, 2H), 5.1 (s, 2H), 7.28-7.36 (m, 5H);  $^{13}\text{C}$  (75 MHz,  $\text{CDCl}_3$ )  $\delta$ =14.0, 16.5, 27.8, 37.4, 61.6, 66.4, 128.2, 128.5, 135.8, 154.2, 162.9, 171.9; IR (CsI) 3273, 2980, 2937, 1732 (oxime), 1179  $\text{cm}^{-1}$ ; MS  $m/z$  294 ( $\text{M} + \text{H}$ ) $^+$ , 311 ( $\text{M} + \text{NH}_4$ ) $^+$ .
